# Supplementary material
Source: PubMed Central journal article supplement (PMC3073471)
Supplement: supp_M010082_jlr.M010082-1.pdf [file supp_M010082_jlr.M010082-1.pdf]

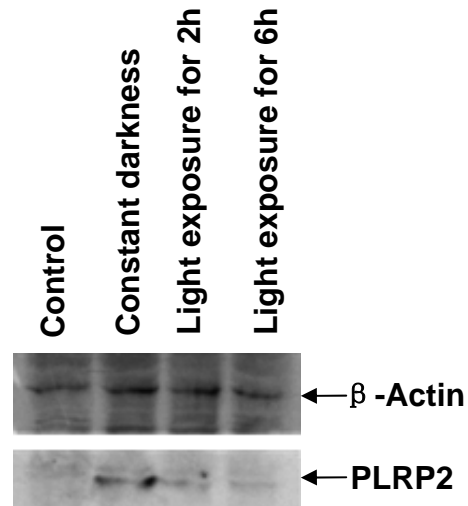

**Supplementary Figure 1** *Light exposure decreased the PLRP2 protein levels in the DD mice liver.* Western blotting of PLRP2 protein levels in different time after light exposure. Mice housed in constant darkness for 72h were exposed to a light pulse for 2h and 6h respectively. The result showed that light exposure decreased the protein level 2h later and for 6h light illumination PLRP2 can't be detected.  $\beta$ -Actin was monitored as internal control.
