# Supplementary material
Source: PubMed Central journal article supplement (PMC3073471)
Supplement: supp_M010082_jlr.M010082-2.pdf [file supp_M010082_jlr.M010082-2.pdf]

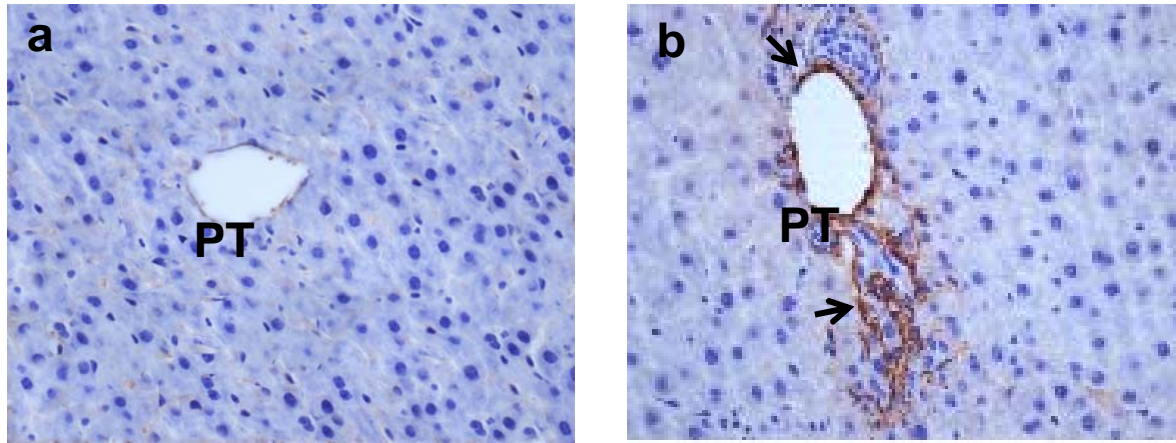

**Supplementary Figure 2 PLRP2 special expressed in portal tracts in the liver.** PLRP2 immunohistochemistry of the livers from control and Va-free mice, control(a), VA-free mice(b)( $\times 400$ ). The *mPlrp2* expressed only in portal tracts after feeding vitamin A free diet for one week.
